# Supplementary material for: Fabrication and Characterisation of 3D-Printed Triamcinolone Acetonide-Loaded Polycaprolactone-Based Ocular Implants
Source: MDPI journal article supplement (doi:10.3390/pharmaceutics15010243), 2023-01-11
Supplement: s1 [file s1]

## Supplementary data

**Table S1.** Pore size measurement of TA-loaded PCL implants after drug release study

| Formulation | Pore size $\pm$ SD ( $\mu\text{m}$ ); n = 15 |
|-------------|----------------------------------------------|
| T5L20H80    | $1.74 \pm 1.25$                              |
| T10L20H80   | $2.03 \pm 1.40$                              |
| T20L20H80   | $3.53 \pm 1.70$                              |
| T5L40H60    | $3.09 \pm 0.95$                              |
| T10L40H60   | $3.39 \pm 1.18$                              |
| T20L40H60   | $3.88 \pm 1.64$                              |
